ments is further evidence of the diminished renal blood flow. It is concluded that the decrease in urinary output during CPPB is a direct effect of the decrease in cardiac output.

$P_{aO_2}$  consistently increased when expiratory resistance was removed, rather than during CPPB, while  $P_{aCO_2}$  increased during CPPB. Although an improvement in arterial oxygenation with continuous positive-pressure breathing has been reported,<sup>1-3</sup> Cheney *et al.* found no change in  $P_{aO_2}$  in anesthetized patients subjected to a positive end-expiratory pressure.<sup>2</sup> While increased expiratory resistance prevented atelectasis, the elevated airway pressure caused an increase in pulmonary vascular resistance, resulting in shunting of blood away from ventilated alveoli, and  $P_{aO_2}$  improved only when the expiratory resistance was released. Cheney believed that elevated expiratory resistance was responsible for the decrease in cardiac output, which when combined with constant oxygen consumption would contribute to a decrease in  $P_{aO_2}$ . Philbin *et al.*<sup>13</sup> demonstrated that  $P_{aO_2}$  was directly related to cardiac output, and thus the increase in cardiac output following the release of CPPB may account for the increase in  $P_{aO_2}$  found after the re-establishment of IPPB.

The authors thank Mr. Maurice Kernisan and Mr. Richard Branch for expert technical assistance.

### References

1. McIntyre RW, Laws AK, Ramachandran PR: Positive expiratory pressure plateau: Improved gas exchange during mechanical ventilation. *Canad Anaesth Soc J* 16:477-486, 1969
2. Asbaugh DG, Petty TL, Bigelow DB, *et al.*: Continuous positive pressure breathing (CPPB) in adult respiratory distress syndrome. *J Thorac Cardiovasc Surg* 57:31-41, 1969
3. Kumar A, Falke KJ, Ceffin B, *et al.*: Continuous positive pressure ventilation in acute respiratory failure. *New Eng J Med* 283: 1430-1436, 1970
4. Baratz RA, Philbin DM, Patterson RW: Urinary output and plasma levels of antidiuretic hormone during intermittent positive-pressure breathing in the dog. *ANESTHESIOLOGY* 32:17-22, 1970
5. Cheney FW, Hornbein TF, Crawford EW: The effect of expiratory resistance on the blood gas tensions of anesthetized patients. *ANESTHESIOLOGY* 28:670-676, 1967
6. Courmand A, Motley HL, Werko L, *et al.*: Physiological studies of the effects of intermittent positive pressure breathing on cardiac output in man. *Amer J Physiol* 152: 162-174, 1948
7. Henry JP, Gauer OH, Reeves JL: Evidence of the atrial location of receptors influencing urine flow. *Circ Res* 4:85-90, 1956
8. Henry JP, Pearce JW: The possible role of cardiac atrial stretch receptors in the induction of changes in urine flow. *J Physiol* 131: 572-585, 1956
9. Yoshida S, Motohashi H, Ibayashi H, *et al.*: Methods for the assay of antidiuretic hormone in plasma with a note on the antidiuretic titer of human plasma. *J Lab Clin Med* 62:279-285, 1963
10. Philbin DM, Baratz RA, Patterson RW: The effect of carbon dioxide on plasma antidiuretic hormone levels during intermittent positive-pressure breathing. *ANESTHESIOLOGY* 33:345-349, 1970
11. Norman JN, MacIntyre J, Shearer JR, *et al.*: Effect of carbon dioxide on renal blood flow. *Amer J Physiol* 219:672-676, 1970
12. Drury DR, Henry JP, Goodman J: The effects of continuous pressure breathing on kidney function. *J Clin Invest* 26:945-951, 1947
13. Philbin DM, Sullivan SF, Bowman FO, *et al.*: Postoperative hypoxemia: Contribution of cardiac output. *ANESTHESIOLOGY* 32:136-142, 1970

### Drugs

**PHENOBARBITAL AND DIPHENYLHYDANTOIN** The half-life of phenobarbital in the sera of children treated for epilepsy with phenobarbital and diphenylhydantoin was determined. The serum half-life in children was shorter than that reported for adults. Phenobarbital may also depress the diphenylhydantoin levels, indicating microsomal enzyme induction. (Garretson, L. K., and Dayton, P. G.: *Disappearance of Phenobarbital and Diphenylhydantoin from Serum of Children, Clin. Pharmacol. Ther.* 11: 674 (Sept.) 1970.)
